# Supplementary material for: Utility of an improved model of amyloid-beta (Aβ1-42) toxicity in Caenorhabditis elegans for drug screening for Alzheimer’s disease
Source: PubMed Central journal article supplement (PMC3519830; doi:10.1186/1750-1326-7-57), 2012-11-21
Supplement: 1750-1326-7-57-S1.pdf [file 1750-1326-7-57-S1.pdf]

pCL354 sequence

ATGACCATGATTACGCCAAGCTTGTCTTCTTCTAAATCCCATAAAAATCCCGAAACTCCTTCCCTCTATCTTCTTTTTCTTCTCGTTTTCAAATGTTTCTCTATCCCATCTCTCATC  
AATTGAGTGGGATGAGGCTATCTTGCCTCTCTTCTGAATCTCTGAACCATCTTACATTACACTGTGGATGACGAGCCCCACAGGCTCCCTTGATCAGATACTGCCATTGGGGATGGCA  
AAGAAGAGAGAAGGTATTGTGAGGATATATTTTTCTAAGAAAAACGTTTGAAGAAAAAGATGAAGAAGATCTGCTTGATTTCATTCACACAAGTTAGAAGTAACAGGGGTCTATATTTT  
GAAGAACTTAAAGGAATGCAACTGAACATAAAAATTAACAAAGGGATTGAATCCTGCAGTGAGTATTTTCGGTTTTTTCACGTGTTCTCTGTAAAAAGAGTAATGCAAAGGGCAAGTTAA  
CTTAGGTCGTAAATGTATTGAATTTGCTTAAAAATCTGAAGATCTAGTGGTGAACCGTGAAGATATCAAGAGGAGGCTGAAGATCTGTTTAAAGAACCATTAATCAAACCTGGTATTCTAT  
TTTCACTGGTTGTATGTAAACATCTATCTTATCTTTTATCACTGTTCTGCACTTTCTTATAAAAAAAGTTGACCGACCGTACTCTCTGAATTCATTTTTCCCGATCTTACCAACTCC  
CGATCTATCTCTATCCCTGGTTTTTCTTCTGCTCCAATGGAATTTCTTGAAGTTCCTACTATCTTCTCTGGCACCTCCACTACGCGTAGGCGTCTCTCGCTTCGTGTATTCCCGGAA  
GCCGTTCCCGTCTCTCCCGCCGTGCCGCTGCCGCACACAGCTTACACCTCGTAGAATCCCCAAAGAGGGGCGTGGCTTGCGGGTGCCAACATCCTCCTGCCGAGGAAGAAGCAGGCA  
CTCATCACTCGCATCATCAACCTCGGGATTGGCCAAAGGACCCAAAGgtatgttcgaatgataactaacataacatagaacattttcagGAGGACCCTTGgctagcaaaaatgcataagg  
ttttgctggcactgttctttatctttctggcaccagcaggtacc**GACGGG**GATGCAGAATCCGACATGACTCAGGATATGAAGTTCATCATCAAAAATTGGTGTCTTTGCAGAAGATC  
**TGGTTCAAACAAGGTGCAATCATTGGACTCATGGTGGGGCGTGTGTGCATAGCGTGA**gctccgcacatcgccgctgtcatcagatcgccatctcgcgcccgtgcctctgacttctaagt  
ccaattactcttcaacatccctacatgctctttctccctgtgctcccaccccctatTTTTgttattatcaaaaaaacttcttctaatttctttgttttttagcttcttttaagtcacct  
ctaacaatgaaattgtgtagattcaaaaatagaattaattcgtataaaaaagtcgaaaaaattgtgctccctcccccaataataaattctatcccaaaatctacacaatgttctgt  
gtacacttcttattgtttttttacttctgataaaatTTTTTgaaacatcatagaaaaaacgacacaaaaatacccttatcatatggtacgtttcagtttatgaccgcaatTTTTtatttc  
ttcgcacgtctgggctctcatgacgtcaaatcatgctcatcgtgaaaaagttttggagtatttttggaaatTTTcaatcaagtgaagtttatgaaattaattttcctgcttttgcttt  
ttgggggtttccctattgtttgtcaagagtttcgaggacggcgtttttctgtcaaaatcacaagtattgatgagcacgatgcaagaaagatcggagaaggtttgggtttgaggctca  
gtggaaggtgagtagaagttgataaattgaaagtggagtgtctatgggtttttgcttaaatgacagaatacattcccataataccaacataactgtttaaattaaacatTTTT  
ctaaatTTTatatgatttcttttaaatttgcaaaaattacttaaattgaaatcccgcgcaaatgagtgacttcatTTTctgattattgtgttttccggctatattaataggtatttgt  
ttgtgTTTTcttattttatgattcgaactccaatttgaatTTTcgaacatatttccctaagaaaaaatatgattaatctggaaaaattggaaaaattttttcaataaaaaaaca  
aagaaaaaatgaagaaaactctattagtttggccataaaacgcaaaaatgctgaaaaatgactcactcatctgcccgggaaatcaagaataatcggcctttttatttttttgggtaa  
tcgtaaaacatttagaaaaatTTTTtaatagttatagtgaggactgtattctgtcatttagggcaaaagccagagacgctactccaccggtgggggatccactagtcggccgacgggccc  
ttctgctcgcgcgtttcgggtgatgacggtgaaaacctctgacacatgcagctcccggagacggtcacagcttgtctgtaagcggatgcccgggagcagacaagccgctcaggcgcgctca  
gccggtgttgccgggtgtcgggctggccttaactatgcccgcacagagcagattgtactgagagtgaccatcagcgggtgtaaataccgcacagatgctgaaggagaaaataccgcatc  
aggcggccttaaggcctcgtgatacgcctatTTTTataggttaatgtcatgataaataatggttcttagacgtcaggtggcacttttccgggaaatgtgcccggaaaccctatTTgtt  
atTTTctaaatacatttcaaatgtatccgctcatgagacaataaccctgataaatgcttcaataaatgaaaaaggaagatagatattcaacatttccggtcgccttattcc  
ctTTTTtgccgcatTTTTgcttctgTTTTTgctcaccagaaaacgctggtgaaagtaaaagatgctgaagatcagttgggtgacagagtggttacatcgaactggatctcaacagcg  
taagatccttgagagttttcggcccgaagaacgttttccaatgatgagcacttttaaagttctgctatgtggcgcggtattatcccgtattgacgcccgggcaaggaactcggtcgccc  
catacactattctcagaatgacttgggttagtactcaccagtcacagaaaagcatttacggatggcatgacagtaagagaatattgagtgctgccataaccatgagtgataaactgc  
ggccaacttacttctgacaacgatcggaggaccgaaggagcctaaccgctTTTTTgcacaacatgggggatcatgtaactcgccttgatcgttgggaaccggagctgaatgaagccatacc  
aaacgacgagcgtgacaccacgatgctgttagcaatggcaacaacgttgcgcaaacatttaactggcgaactacttactctagcttcccggcaacaattaatagactggatggaggcgga  
taaagttgcagaccacttctgcgctcggccctccggctggctggTTTTattgctgataaaatcggagccggtgagcgtgggtctcgcggtatcattgcagcactggggccagatgggtaa  
gccctcccgtatcgtagttatctacacgacggggagtcaggcaactatggatgaaacagaaatgacagatcgtgagataggtgctcactgattaaagcattgtaactgtcagaccaagt  
ttactcatataacttttagattgattttaaacttcatTTTTtaatttaaaggatctaggtgaagatcTTTTgataatctcatgacaaaaatccccttaacgtgagttttcgttccactg  
agcgtcagaccocgtagaaaagatcaaaggatcttcttgagatcctTTTTTctgcccgaatctgctgcttgcacaaaaaaaccaccgctaccagcgggtggtttgtttgcccgatca  
agagctaccaactctTTTTccgaaggttaactgcttcagcagagcgcagataccaaatactgtccttctagtgtagccgtagttaggccaccacttcaagaactctgtagcaccgcctac  
atacctcgcctgctaactctgttaccagtggtgctgcccagtgggcgataagtcgtgcttaccgggttgactcaagacgatagttaccggataaggcgcagcggctcgggctgaacggg  
gggttcgtgcacacagcccagcttggagcgaacgacctacaccgaactgagatacctacagcgtgagcattgagaaagcgcacgcttcccgaaggagaaagcggacaggtatccggg  
aagcggcagggctcggaaacaggagagcgcacgagggagcttccagggggaaacgcctggtatctttatagtcctgctcgggttccgccacctctgacttgagcgtcgatttttgtgatgctc  
gtcagggggggcggagcctatggaaaaacgccagcaacgcggcctTTTTacggttctcggccttttctgctcacatgttcttctcctgcttattcccctgattctgtggataa  
ccgtattaccgctttgagtgagctgataccgctcgcgcagccgaacgaccgagcgcagcagtgagtgagcaggaagcggaaagagcgcacaataacgaaaccgctctcccgcg  
ttggccgattcattaatgcagctggcagcaggtttcccgactggaaagcggcagtgagcgaacgcaattaatgtgagttagctcactcatttaggcaccccaggctttacactttat  
gcttccggctcgtatgttgtgtggaattgtgagcggataacaatttcacacaggaaacagct

Fig S1
